# Supplementary material
Source: PubMed Central journal article supplement (PMC4187673)
Supplement: JB.01877-14_zjb999093296so1.pdf [file JB.01877-14_zjb999093296so1.pdf]

**Supplemental Information for:**

**Localization of anionic phospholipids in *Escherichia coli* cells**

Piercen M. Oliver,<sup>a</sup> John A. Crooks,<sup>a</sup> Mathias Leidl,<sup>b</sup> Earl J. Yoon,<sup>a</sup> Alan Saghatelian,<sup>b</sup> and Douglas B. Weibel<sup>a,c,d,#</sup>

Department of Biochemistry, University of Wisconsin-Madison, Madison, WI<sup>a</sup>;  
Department of Chemistry and Chemical Biology, Harvard University, Cambridge, MA<sup>b</sup>;  
Department of Chemistry, University of Wisconsin-Madison, Madison, WI<sup>c</sup>;  
Department of Biomedical Engineering, University of Wisconsin-Madison, Madison, WI<sup>d</sup>

#Author to whom correspondence should be addressed

Douglas B. Weibel  
Departments of Biochemistry, Chemistry, and Biomedical Engineering  
440 Henry Mall  
Madison, WI 53706  
United States  
Phone: (608) 890-1342  
E-mail: [weibel@biochem.wisc.edu](mailto:weibel@biochem.wisc.edu)

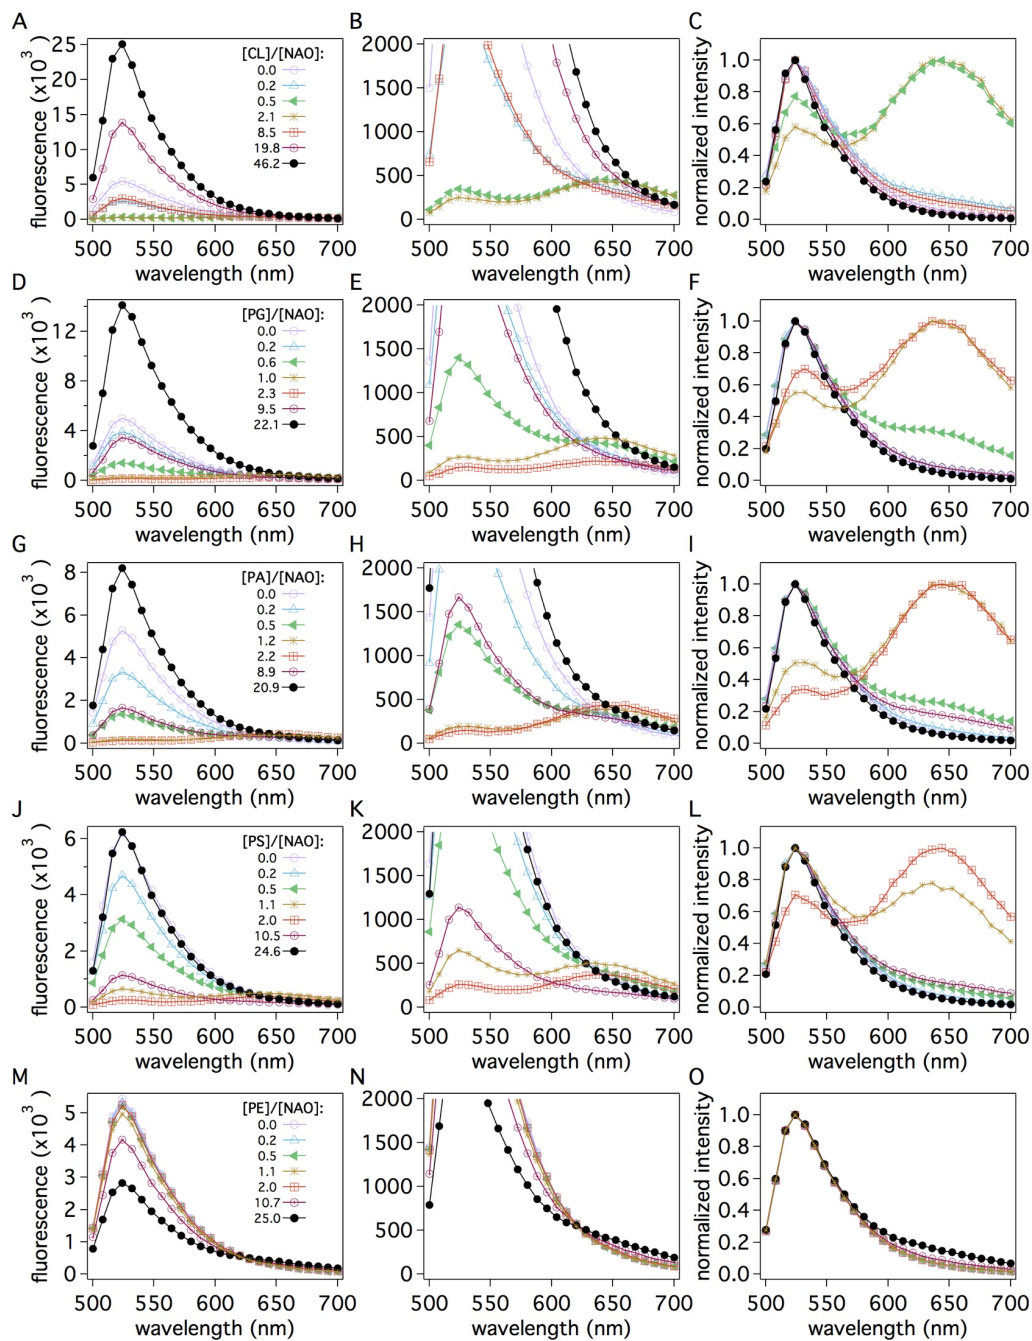

**Figure S1.** Fluorescence emission spectra of liposomes mixed with increasing concentrations of NAO. (A, D, G, J, M) Fluorescence versus wavelength spectra of NAO at seven concentrations of CL, PG, PA, PS, and PE, respectively. (B, E, H, K, N) Expanded view of the spectra immediately to the left. (C, F, I, L, O) Spectra (from the left) normalized to a maximum intensity of 1. NAO concentration is 5  $\mu\text{M}$  in 10 mM Tris buffer, pH 8. Excitation is at a wavelength of 456 nm.

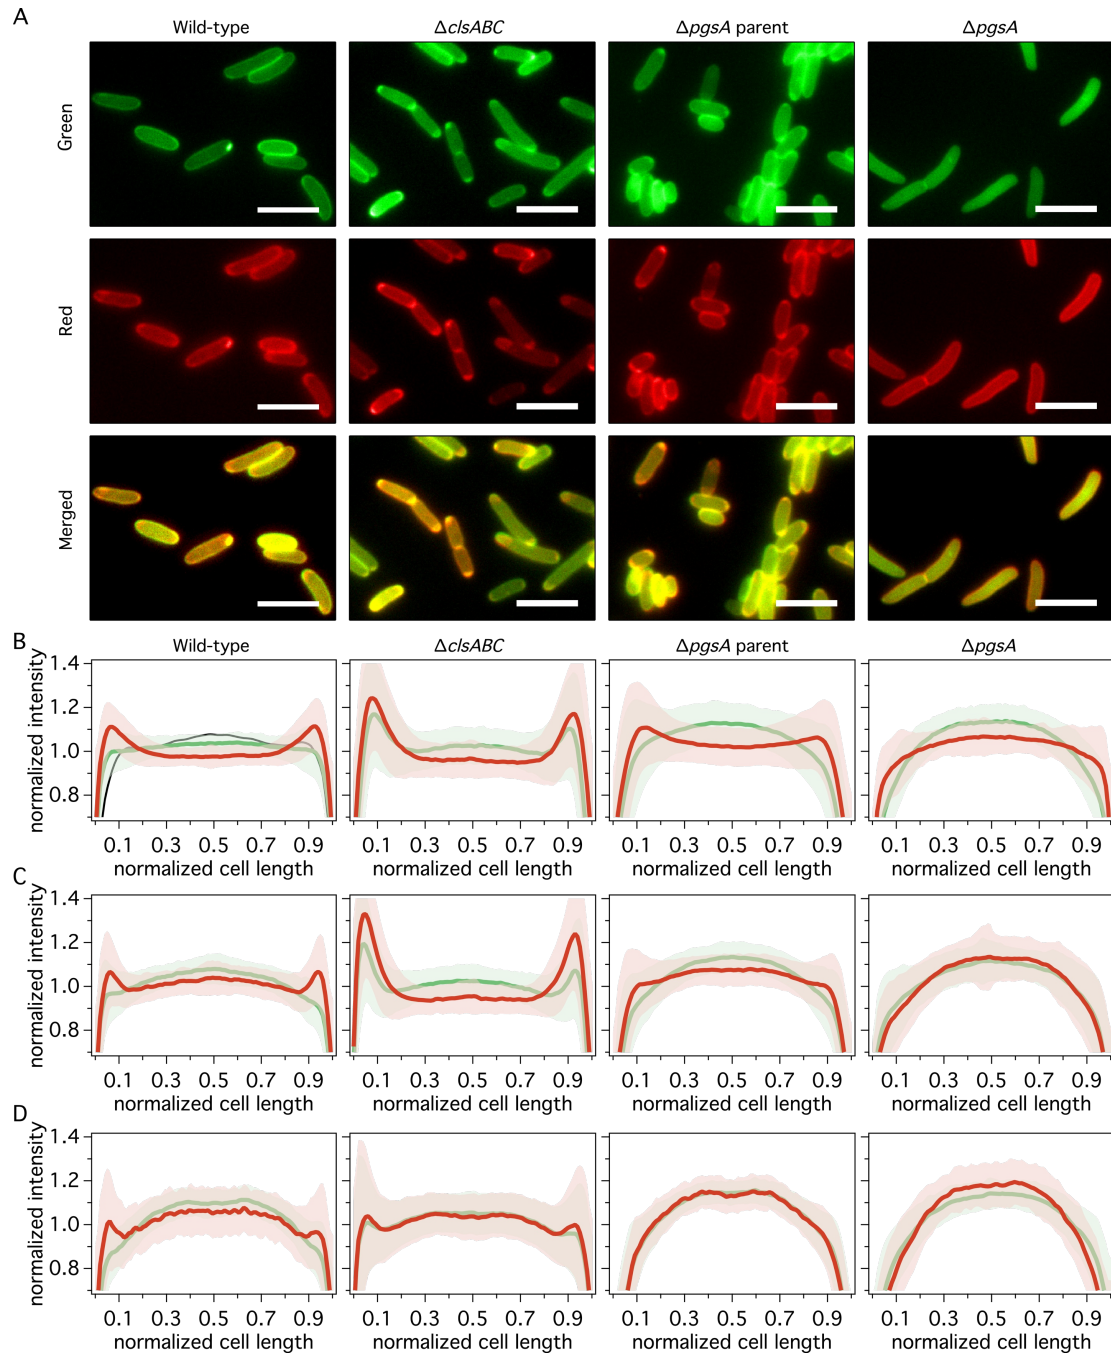

**Figure S2.** Comparison of green and red fluorescence emission of *E. coli* cells labeled with NAO. (A) Representative images of wild-type (MG1655),  $\Delta clsABC$  (MG1655 BKT12),  $\Delta pgsA$  parent (UE53), and  $\Delta pgsA$  (UE54) *E. coli* cells labeled with 2  $\mu M$  NAO and cultured at 30  $^{\circ}C$  to OD = 0.55 ( $\lambda = 600$  nm, see Materials and Methods for details). Green and red channels are shown for each mutant, along with a merged image. The brightness of each channel in the merged images was altered until some yellow color was visible. Scale bars represent 5  $\mu m$ . (B-D) Averaged intensity profiles of cells labeled with NAO versus the normalized cell length at concentrations of (B) 2  $\mu M$ , (C) 1  $\mu M$ , and (D) 0.5  $\mu M$  NAO. The intensities along the long-axis of each cell were normalized to an area of 1 and averaged (N=166 to 733). The averages in the red channel are shown in red and green in green. The solid black line in (B) shows the average line profile from staining 198 wild-type cells with FM4-64. The shaded space surrounding the NAO fluorescence intensity profiles designates the standard error in the intensity at each point. Septating cells were intentionally left out of the analysis.

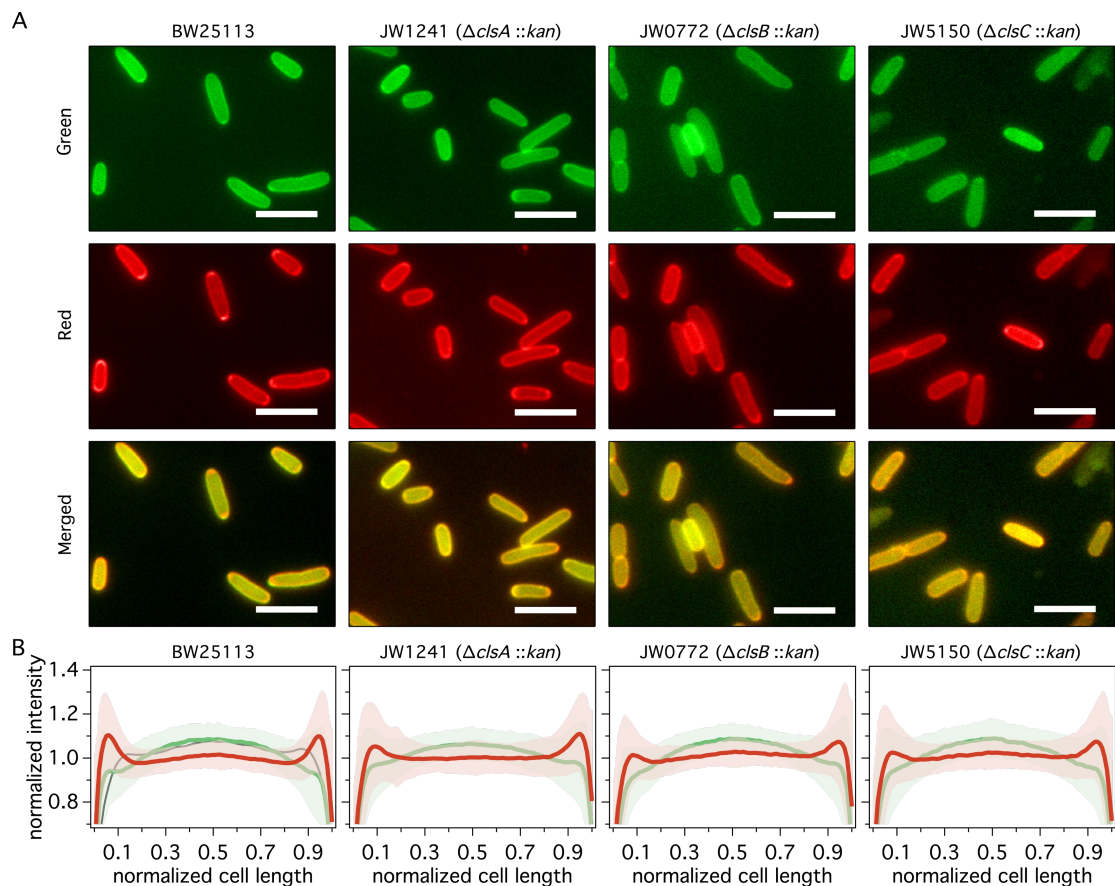

**Figure S3.** Comparison of green and red fluorescence emission of *E. coli* cells labeled with NAO from the Keio collection.<sup>1</sup> (A) Representative images of wild-type (BW25113),  $\Delta clsA$  (JW1241),  $\Delta clsB$  (JW0772), and  $\Delta clsC$  (JW5150) *E. coli* cells labeled with 2  $\mu\text{M}$  NAO and cultured at 30  $^{\circ}\text{C}$  to OD = 0.55 ( $\lambda = 600$  nm, see Materials and Methods for details). Green and red channels are shown for each mutant, along with a merged image. The brightness of each channel in the merged images was altered until some yellow color was visible. Scale bars represent 5  $\mu\text{m}$ . (B-D) Averaged intensity profiles of cells labeled with NAO versus the normalized cell length at a concentration of 2  $\mu\text{M}$  NAO. The intensities along the long-axis of each cell were normalized to an area of 1 and averaged (N=246 to 492). The averages in the red channel are shown in red and green in green. The solid black line in (B) shows the average line profile from staining 198 wild-type (MG1655) cells with FM4-64. The shaded space surrounding the NAO fluorescence intensity profiles designates the standard error in the intensity at each point. Septating cells were intentionally left out of the analysis.

<sup>1</sup>Baba T, Ara T, Hasegawa M, Takai Y, Okumura Y, Baba M, Datsenko KA, Tomita M, Wanner BL, Mori H. 2006. Construction of *Escherichia coli* K-12 in-frame, single-gene knockout mutants: the Keio collection. *Mol Syst Biol* 2:2006.0008.

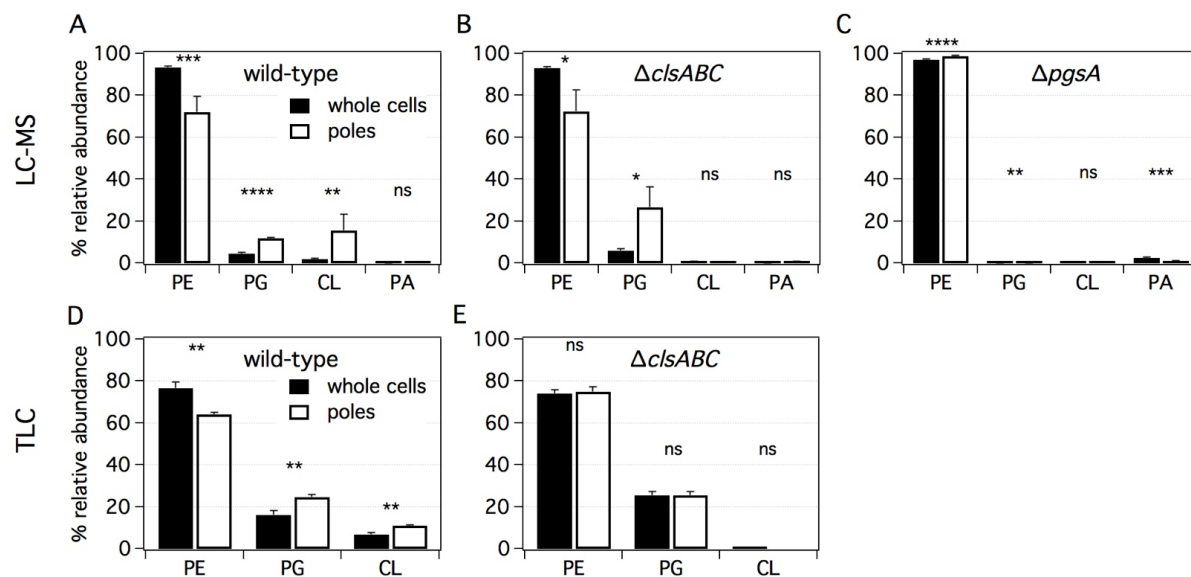

**Figure S4.** Relative abundances of PE, PG, CL, and PA determined by LC-MS (A-C) and TLC/phosphorus analysis (D & E) of minicell producing mutants of (A & D) wild-type (WM1032), (B & E)  $\Delta clsABC$  (POM10), and (C)  $\Delta pgsA$  (UEM543) *E. coli*. To assess differences between the lipid abundances in whole cells and poles in the various *E. coli* strains, we performed Chi-squared tests. All tests were two-sided and statistical significance was considered when a p-value < 0.05 was observed (ns, non-significant; \*, p < 0.05; \*\*, p < 0.01; \*\*\*, p < 0.001). Error bars indicate the standard deviation of the mean (n = 4+ replicates).



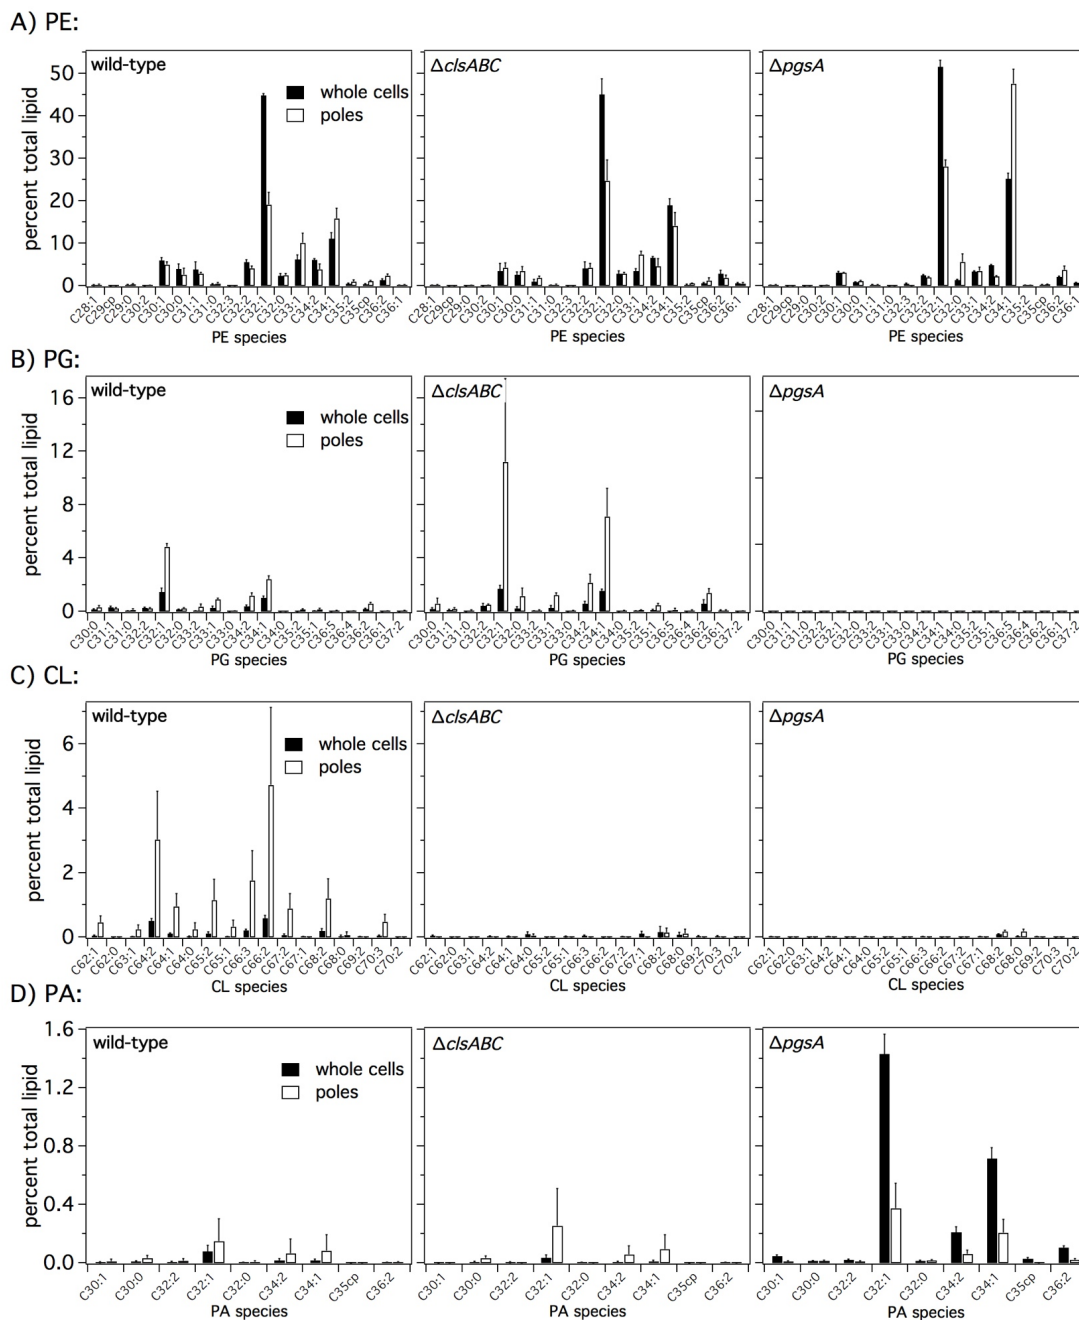

**Figure S5.** Fractional abundances of lipid species by LC-MS in whole cells and poles of the wild-type (WM1032),  $\Delta clsABC$  (POM10), and  $\Delta pgsA$  (UEM543) mutants of *E. coli*. Lipid species that were analyzed with respect to a corresponding internal standard are presented in this figure: (A) PE, (B) PG, (C) CL, and (D) PA. Each lipid species is presented as the total number of carbons in all alkyl chains on a PL, the total number of unsaturated bonds (after the colon), and whether or not a cyclopropyl group is present (i.e., “cp”). Error bars indicate the standard deviation of the mean (n = 4+ replicates). The fractional abundance of each species was calculated by dividing the average standardized intensity of one species by the average standardized summed total of all lipid species for all headgroups (i.e., PEs + PGs + CLs + PAs) for either whole cells or poles.

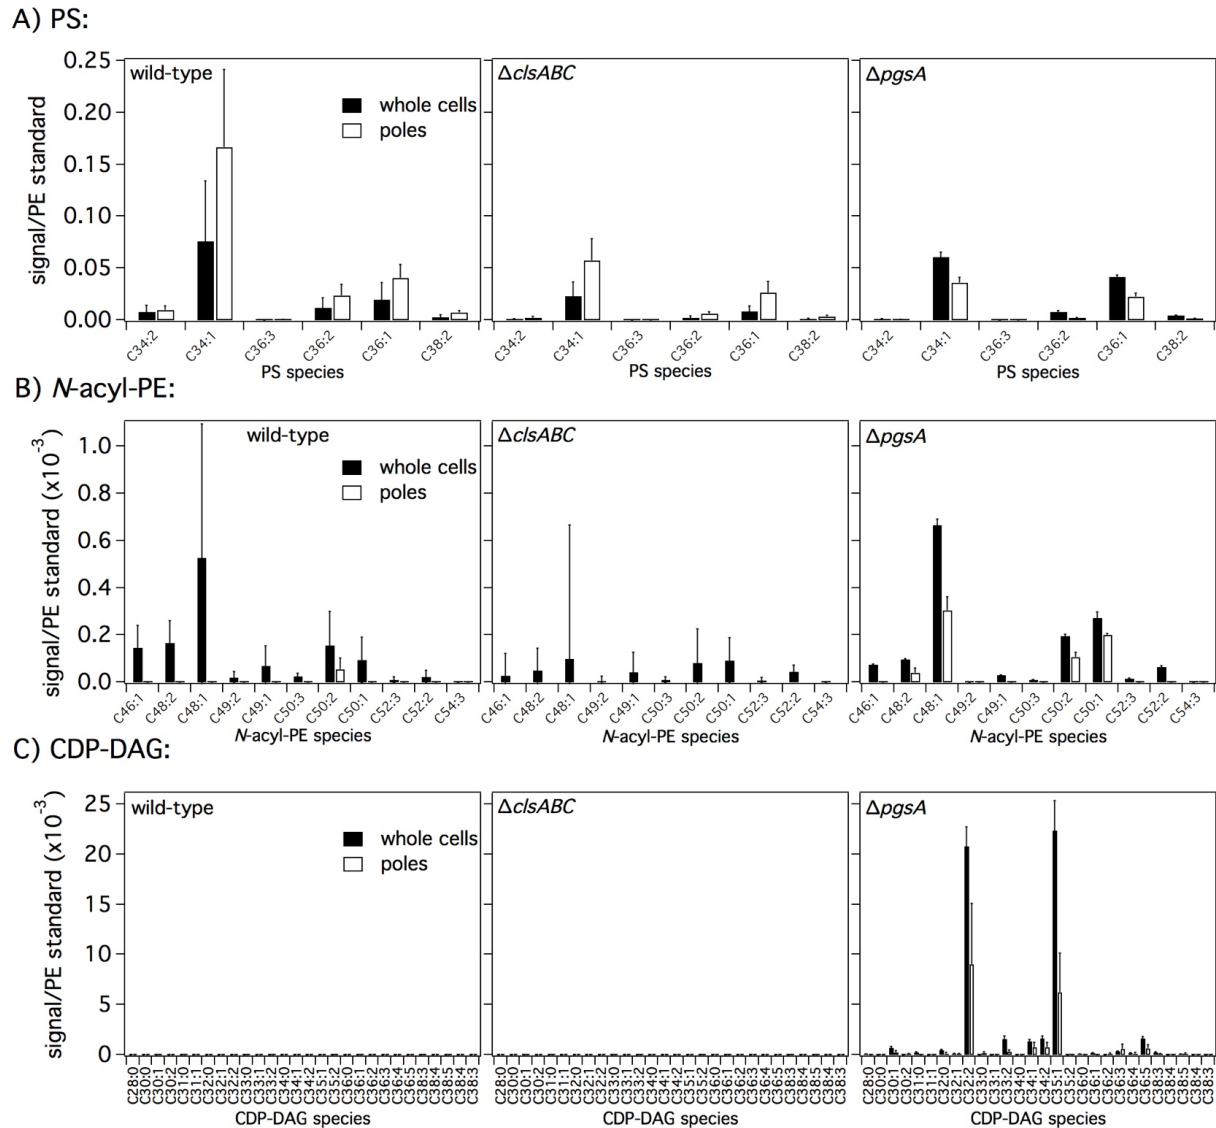

**Figure S6.** Semi-standardized intensities of lipid species by LC-MS in whole cells and poles of the wild-type (WM1032),  $\Delta clsABC$  (POM10), and  $\Delta pgsA$  (UEM543) mutants of *E. coli*. Lipid species that were not analyzed with respect to a corresponding internal standard are presented in this figure: (A) PS, (B) *N*-acyl-PE, and (C) CDP-DAG. Each lipid species is presented as the total number of carbons in all alkyl chains on a PL and the total number of unsaturated bonds (after the colon). Error bars indicate the standard deviation of the mean ( $n = 4+$  replicates). The intensity of each species was calculated by dividing the average intensity of one species by the average summed total of all standardized lipid species (e.g., PEs + PGs + CLs + PAs) for either whole cells or poles. Since standards for PS, *N*-acyl-PE, and CDP-DAG were not added, relative comparisons can be made only within one family of lipids.

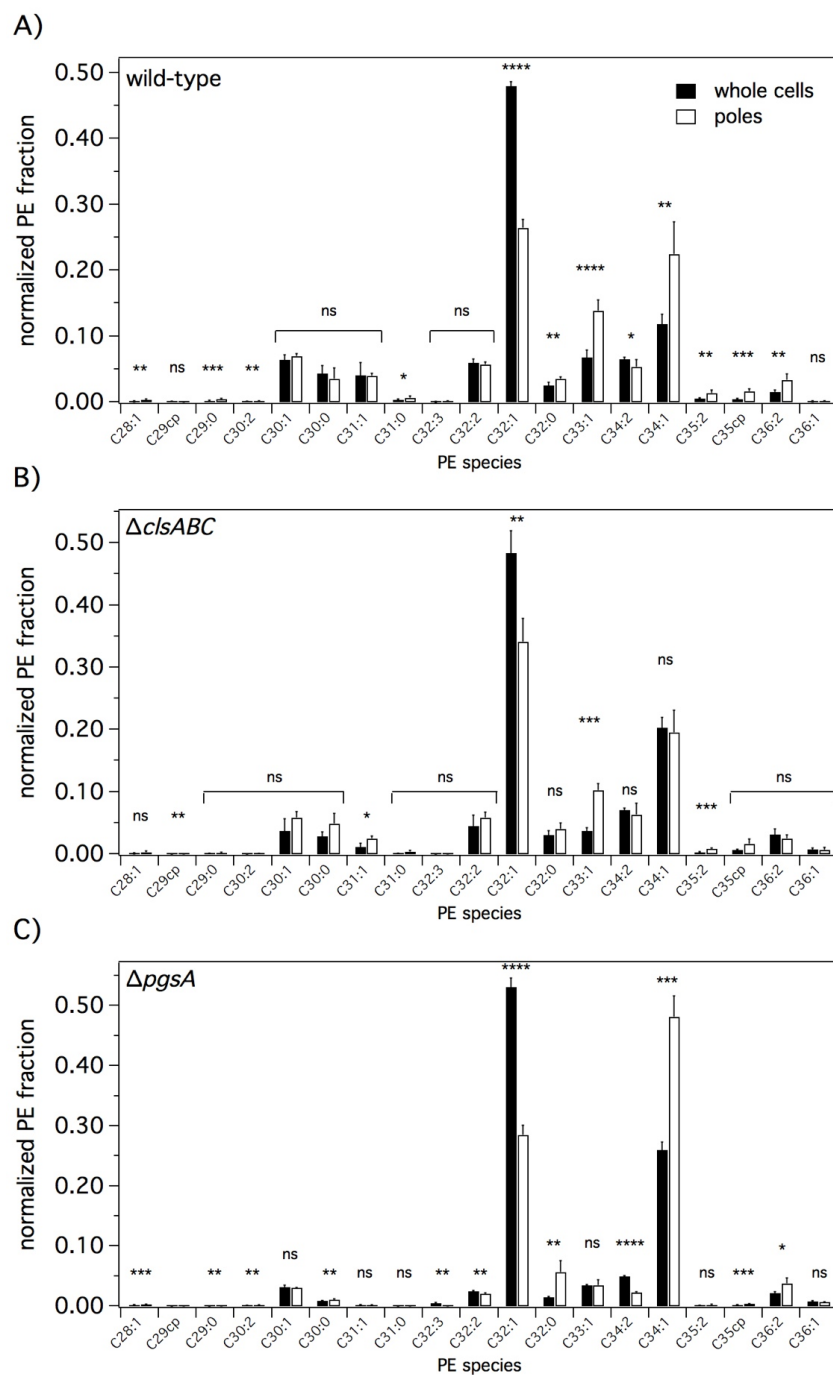

**Figure S7.** Normalized intensities of PE species by LC-MS in whole cells and poles of the A) wild-type (WM1032), B)  $\Delta clsABC$  (POM10), and C)  $\Delta pgsA$  (UEM543) mutants of *E. coli*. Intensities were normalized so that all the intensities of PE species for a particular mutant (whole cells or poles) sum to '1'. This comparison is independent of standards and other lipids. To assess differences between the lipid species abundances in whole cells and poles in the various *E. coli* strains, we performed Chi-squared tests. All tests were two-sided and statistical significance was considered when a p-value < 0.05 was observed (ns, non-significant; \*, p < 0.05; \*\*, p < 0.01; \*\*\*, p < 0.001). Error bars indicate the standard deviation of the mean (n = 4+ replicates).



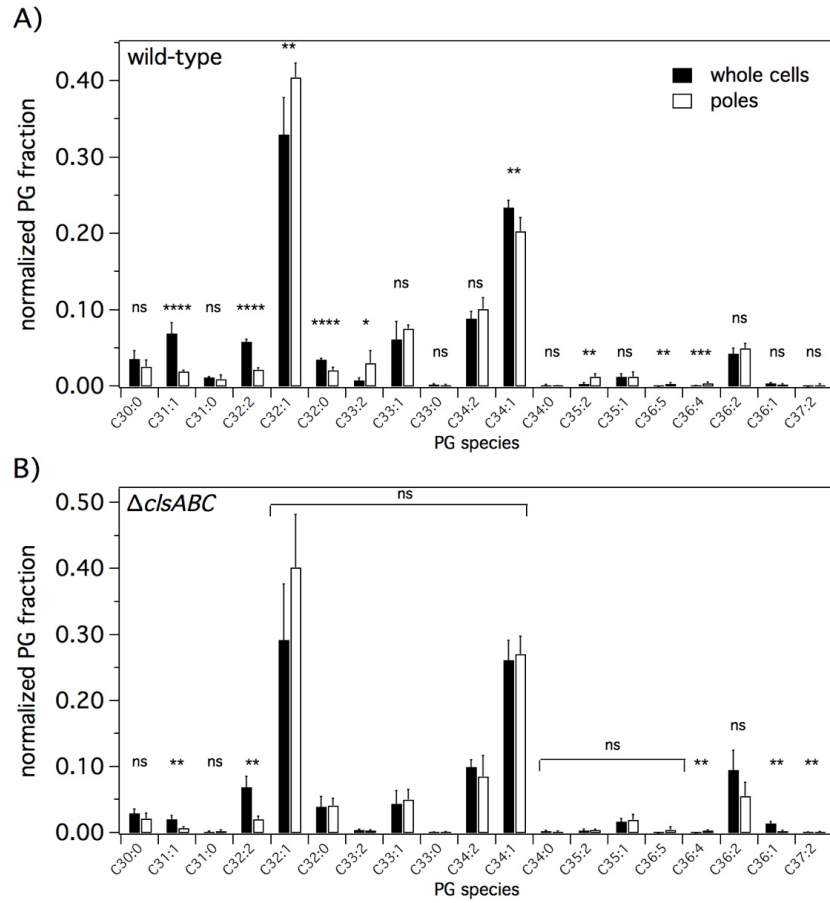

**Figure S8.** Normalized intensities of PG species by LC-MS in whole cells and poles of the A) wild-type (WM1032) and B)  $\Delta clsABC$  (POM10) mutants of *E. coli*. The  $\Delta pgsA$  (UEM543) mutant is not shown due to its low measured abundance of PGs. Intensities were normalized so that all the intensities of PG species for a particular mutant (whole cells or poles) sum to '1'. This comparison is independent of standards and other lipids. To assess differences between the lipid species abundances in whole cells and poles in the various *E. coli* strains, we performed Chi-squared tests. All tests were two-sided and statistical significance was considered when a p-value < 0.05 was observed (ns, non-significant; \*, p < 0.05; \*\*, p < 0.01; \*\*\*, p < 0.001). Error bars indicate the standard deviation of the mean (n = 4+ replicates).

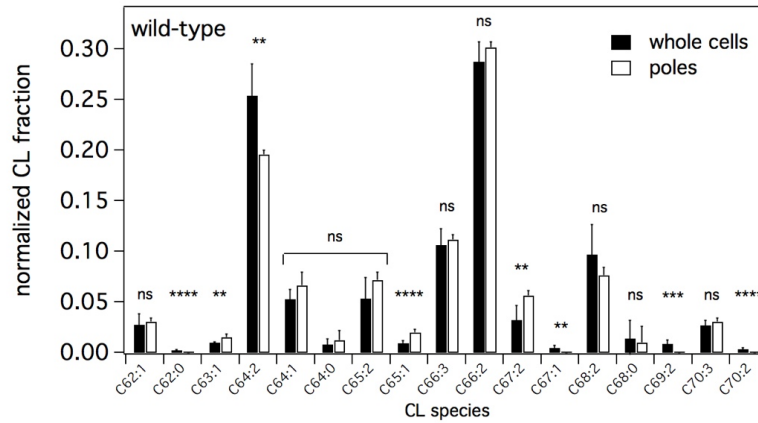

**Figure S9.** Normalized intensities of CL species by LC-MS in whole cells and poles of the wild-type (WM1032) *E. coli*. The  $\Delta$  *clsABC* (POM10) and  $\Delta$  *pgsA* (UEM543) mutants are not shown due to their low measured abundance of CLs. Intensities were normalized so that all the intensities of CL species for a particular mutant (whole cells or poles) sum to '1'. This comparison is independent of standards and other lipids. To assess differences between the lipid species abundances in the whole cells and poles in the *E. coli* strain, we performed Chi-squared tests. All tests were two-sided and statistical significance was considered when a p-value < 0.05 was observed (ns, non-significant; \*, p < 0.05; \*\*, p < 0.01; \*\*\*, p < 0.001). Error bars indicate the standard deviation of the mean (n = 4+ replicates).

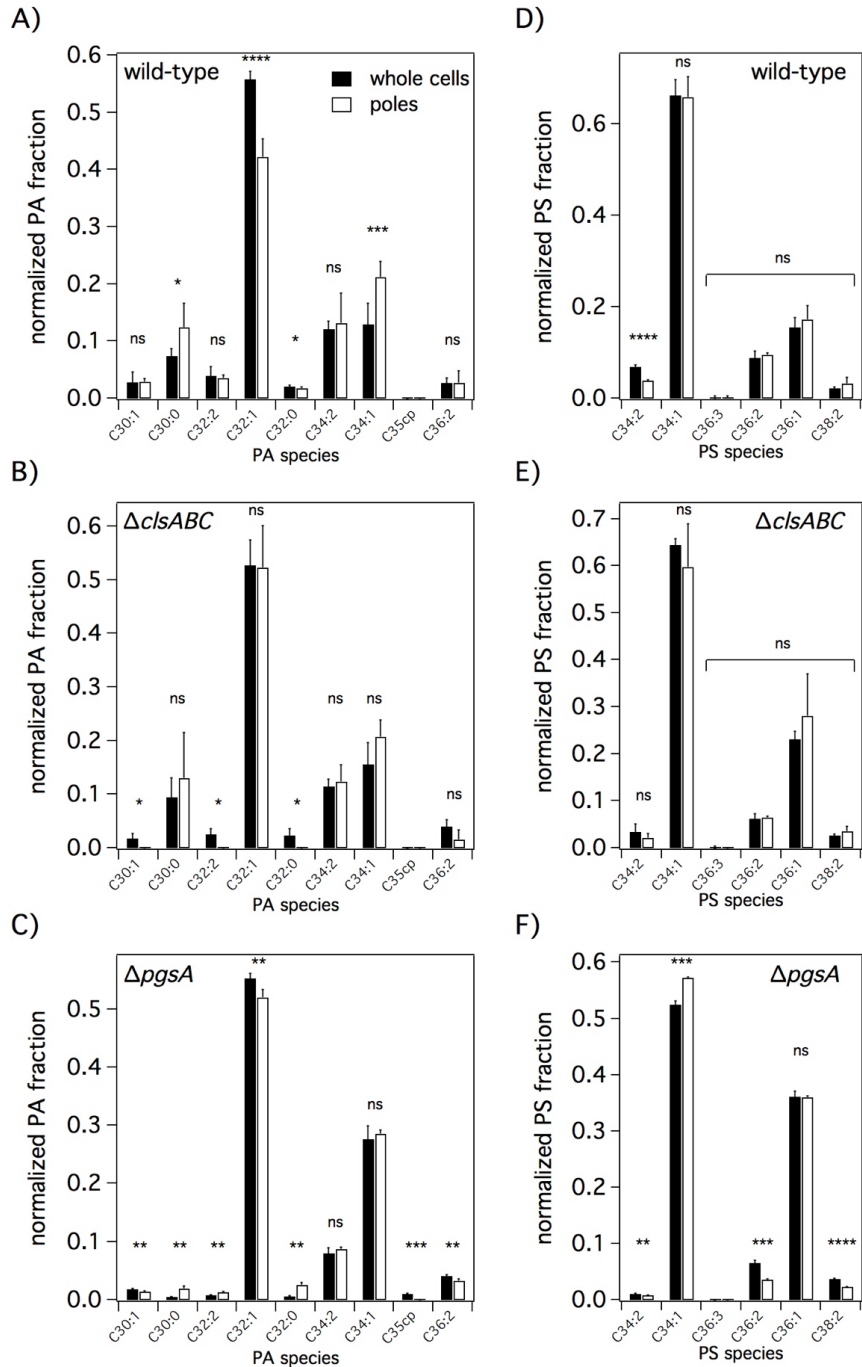

**Figure S10.** Normalized intensities of PA and PS species by LC-MS in whole cells and poles of the A & D) wild-type (WM1032), B & E)  $\Delta clsABC$  (POM10), and C & F)  $\Delta pgsA$  (UEM543) mutants of *E. coli*. Intensities were normalized so that all the intensities of PA or PS species for a particular mutant (whole cells or poles) sum to '1'. This comparison is independent of standards and other lipids. To assess differences between the lipid species abundances in whole cells and poles in the various *E. coli* strains, we performed Chi-squared tests. All tests were two-sided and statistical significance was considered when a p-value < 0.05 was observed (ns, non-significant; \*, p < 0.05; \*\*, p < 0.01; \*\*\*, p < 0.001). Error bars indicate the standard deviation of the mean (n = 4+ replicates).

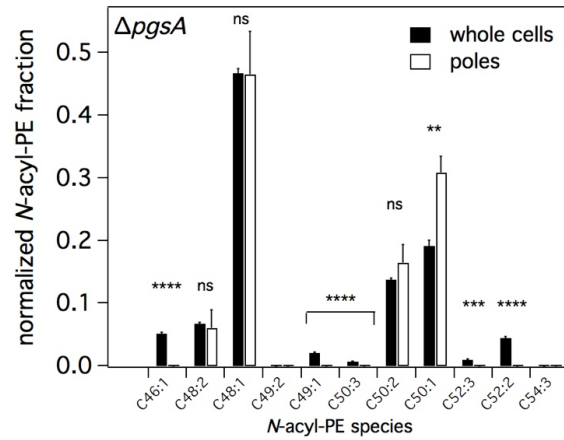

**Figure S11.** Normalized intensities of *N*-acyl-PE species by LC-MS in whole cells and poles of the  $\Delta pgsA$  (UEM543) mutant of *E. coli*. The wild-type (WM1032) and  $\Delta clsABC$  (POM10) mutants are not shown due to their low measured abundance of *N*-acyl-PEs. Intensities were normalized so that all the intensities of *N*-acyl-PE species for a particular mutant (whole cells or poles) sum to '1'. This comparison is independent of standards and other lipids. To assess differences between the lipid species abundances in whole cells and poles in the *E. coli* strain, we performed Chi-squared tests. All tests were two-sided and statistical significance was considered when a p-value < 0.05 was observed (ns, non-significant; \*, p < 0.05; \*\*, p < 0.01; \*\*\*, p < 0.001). Error bars indicate the standard deviation of the mean (n = 4 replicates).

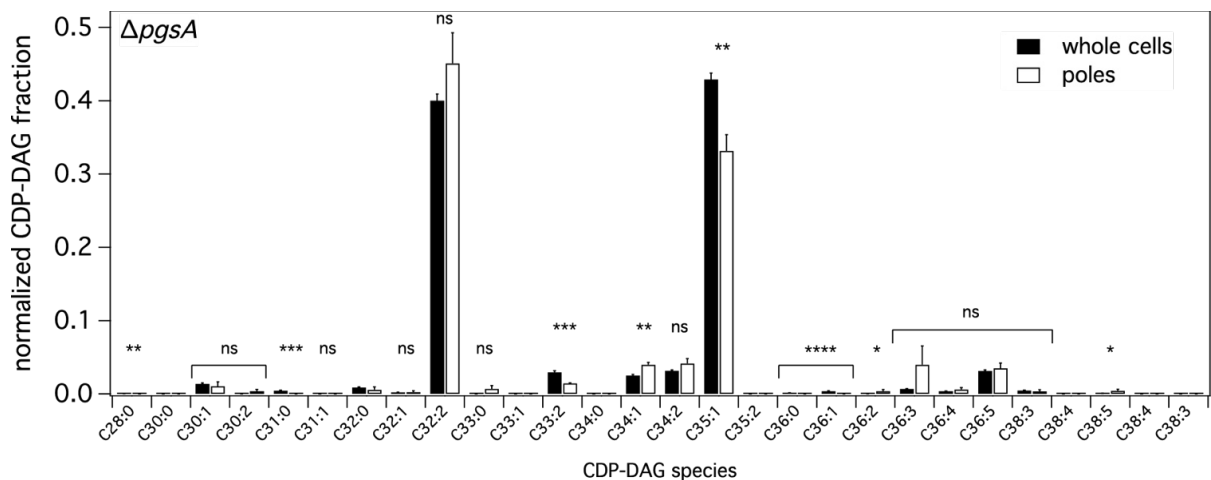

**Figure S12.** Normalized intensities of CDP-DAG species by LC-MS in whole cells and poles of the  $\Delta pgsA$  (UEM543) mutant of *E. coli*. The wild-type (WM1032) and  $\Delta clsABC$  (POM10) mutants are not shown due to their low measured abundance of CDP-DAGs. Intensities were normalized so that all the intensities of CDP-DAG species for a particular mutant (whole cells or poles) sum to '1'. This comparison is independent of standards and other lipids. To assess differences between the lipid species abundances in whole cells and poles in the *E. coli* strain, we performed Chi-squared tests. All tests were two-sided and statistical significance was considered when a p-value < 0.05 was observed (ns, non-significant; \*, p < 0.05; \*\*, p < 0.01; \*\*\*, p < 0.001). Error bars indicate the standard deviation of the mean (n = 4 replicates).



**Table S1.** Semi-standardized total intensities (arbitrary units) of lipid species PS, *N*-acyl-PE, and CDP-DAG by LC-MS in whole cells and poles of the wild-type (WM1032),  $\Delta$  *clsABC* (POM10), and  $\Delta$  *pgsA* (UEM543) mutants of *E. coli*. Each of these total lipid species was normalized to the average summed total of all standardized lipid species (e.g., PEs + PGs + CLs + PAs) for either whole cells or poles. Since standards for PS, *N*-acyl-PE, and CDP-DAG were not added, comparisons can only be made within one family of lipids. To assess differences between the lipid abundances in whole cells and poles in the various *E. coli* strains, we performed Chi-squared tests. All tests were two-sided and statistical significance was considered when a p-value < 0.05 was observed (ns, non-significant; \*, p < 0.05; \*\*, p < 0.01; \*\*\*, p < 0.001).

| <b>Genotype</b>        | <b>PS</b>            |          |                      | <b><i>N</i>-acyl-PE</b>          |          |                                  | <b>CDP-DAG</b>              |          |                              |
|------------------------|----------------------|----------|----------------------|----------------------------------|----------|----------------------------------|-----------------------------|----------|------------------------------|
|                        | <b>Whole cells</b>   | <i>p</i> | <b>Poles</b>         | <b>Whole cells</b>               | <i>p</i> | <b>Poles</b>                     | <b>Whole cells</b>          | <i>p</i> | <b>Poles</b>                 |
| Wild-type              | 0.12 ( $\pm$ 0.09)   | *        | 0.2 ( $\pm$ 0.1)     | $1 (\pm 1) \times 10^{-3}$       | *        | $60 (\pm 50) \times 10^{-6}$     | <i>n.d.</i>                 |          | <i>n.d.</i>                  |
| $\Delta$ <i>clsABC</i> | 0.04 ( $\pm$ 0.02)   | *        | 0.10 ( $\pm$ 0.03)   | $0.5 (\pm 0.1) \times 10^{-3}$   |          | <i>n.d.</i>                      | <i>n.d.</i>                 |          | <i>n.d.</i>                  |
| $\Delta$ <i>pgsA</i>   | 0.116 ( $\pm$ 0.007) | ***      | 0.063 ( $\pm$ 0.009) | $1.42 (\pm 0.06) \times 10^{-3}$ | ****     | $0.65 (\pm 0.06) \times 10^{-3}$ | $52 (\pm 6) \times 10^{-3}$ | **       | $20 (\pm 12) \times 10^{-3}$ |

“*n.d.*” = none detected

**Table S2.** Molecular mass of PE and PG species detected in *E. coli*. Each lipid species is presented as the total number of carbons in all alkyl chains on a PL, the total number of unsaturated bonds (after the colon), and whether or not a cyclopropyl group is present (i.e., “cp”).

| PE acyl chain compositions   | PE mass                  |          | PG acyl chain compositions   | PG mass                  |          |
|------------------------------|--------------------------|----------|------------------------------|--------------------------|----------|
|                              | Exact                    | Measured |                              | Exact                    | Measured |
| <i>Carbons:unsaturations</i> | <i>[M-H]<sup>-</sup></i> |          | <i>Carbons:unsaturations</i> | <i>[M-H]<sup>-</sup></i> |          |
| C28:1                        | 632.4291                 | 632.4304 | C30:0                        | 693.4722                 | 693.4710 |
| C29cp*                       | 646.4448                 | 676.4909 | C31:1                        | 705.4729                 | 705.4711 |
| C29:0                        | 648.4627                 | 648.4621 | C31:0                        | 707.4870                 | 707.4863 |
| C30:2                        | 658.4448                 | 658.4456 | C32:2                        | 717.4725                 | 717.4710 |
| C30:1                        | 660.4620                 | 660.4604 | C32:1                        | 719.4873                 | 719.4889 |
| C30:0                        | 662.4776                 | 662.4765 | C32:0                        | 721.5039                 | 721.5025 |
| C31:1                        | 674.4779                 | 674.4797 | C33:2                        | 731.4887                 | 731.4883 |
| C31:0                        | 676.4917                 | 676.4909 | C33:1                        | 733.5030                 | 733.5048 |
| C32:3                        | 684.4604                 | 684.4596 | C33:0                        | 735.5211                 | 735.5198 |
| C32:2                        | 686.4776                 | 686.4794 | C34:2                        | 745.5034                 | 745.5018 |
| C32:1                        | 688.4930                 | 688.4915 | C34:1                        | 747.5188                 | 747.5191 |
| C32:0                        | 690.5080                 | 690.5080 | C34:0                        | 749.5311                 | 749.5342 |
| C33:1                        | 702.5074                 | 702.5066 | C35:2                        | 759.5147                 | 759.5179 |
| C34:2                        | 714.4985                 | 714.5073 | C35:1                        | 761.5358                 | 761.5337 |
| C34:1                        | 716.5244                 | 716.5257 | C36:5                        | 767.4891                 | 767.4848 |
| C35:2                        | 728.5230                 | 728.5222 | C36:4                        | 769.5046                 | 769.5000 |
| C35cp*                       | 730.5387                 | 730.5372 | C36:2                        | 773.5327                 | 773.5330 |
| C36:2                        | 742.5361                 | 742.5393 | C36:1                        | 775.5489                 | 775.5494 |
| C36:1                        | 744.5551                 | 744.5547 | C37:2                        | 787.5510                 | 787.5493 |

\* “cp” designates that one of the fatty acids is cyclopropanated

**Table S3.** Molecular mass of CL and PA species detected in *E. coli*. Each lipid species is presented as the total number of carbons in all alkyl chains on a PL, the total number of unsaturated bonds (after the colon), and whether or not a cyclopropyl group is present (i.e., “cp”)

| CL acyl chain compositions   |                                           | CL mass   |              | PA acyl chain compositions | PA mass      |          |
|------------------------------|-------------------------------------------|-----------|--------------|----------------------------|--------------|----------|
| <i>Carbons:unsaturations</i> | <i>Most likely structure</i> <sup>2</sup> | Exact     | Measured     |                            | Exact        | Measured |
|                              |                                           |           | <i>[M-H]</i> |                            | <i>[M-H]</i> |          |
| C62:1                        | C16:1/C16:0 C16:0/C14:0                   | 1321.9180 | 1321.9278    | C30:1                      | 617.4182     | 617.4183 |
| C62:0                        | C16:0/C16:0 C16:0/C14:0                   | 1323.9337 | 1323.9492    | C30:0                      | 619.4339     | 619.4348 |
| C63:1                        | C17:1/C16:0 C16:0/C14:0                   | 1335.9337 | 1335.9443    | C32:2                      | 643.4339     | 643.4349 |
| C64:2                        | C16:1/C16:0 C16:1/C16:0                   | 1347.9341 | 1347.9453    | C32:1                      | 645.4495     | 645.4520 |
| C64:1                        | C16:1/C16:0 C16:0/C16:0                   | 1349.9491 | 1349.9624    | C32:0                      | 647.4652     | 647.4608 |
| C64:0                        | C16:0/C16:0 C16:0/C16:0                   | 1351.9491 | 1351.9736    | C34:2                      | 671.4660     | 671.4664 |
| C65:2                        | C17:1/C16:0 C16:1/C16:0                   | 1361.9491 | 1361.9601    | C34:1                      | 673.4808     | 673.4842 |
| C65:1                        | C17:1/C16:0 C16:0/C16:0                   | 1363.9650 | 1363.9760    | C35cp*                     | 687.4965     | 687.4959 |
| C66:3                        | C18:1/C16:1 C16:1/C16:0                   | 1373.9501 | 1373.9585    | C36:2                      | 699.4965     | 699.4944 |
| C66:2                        | C18:1/C16:0 C16:1/C16:0                   | 1375.9640 | 1375.9739    |                            |              |          |
| C67:2                        | C18:1/C16:0 C17:1/C16:0                   | 1389.9801 | 1389.9921    |                            |              |          |
| C67:1                        | C18:0/C16:0 C17:1/C16:0                   | 1391.9801 | 1392.0046    |                            |              |          |
| C68:2                        | C18:1/C16:0 C18:1/C16:0                   | 1403.9961 | 1404.0076    |                            |              |          |
| C68:0                        | C18:0/C16:0 C18:0/C16:0                   | 1408.0271 | 1408.0362    |                            |              |          |
| C69:2                        | C18:0/C16:1 C18:0/C17:1                   | 1418.0119 | 1418.0227    |                            |              |          |
| C70:3                        | C18:1/C16:0 C18:1/C18:1                   | 1430.0121 | 1430.0185    |                            |              |          |
| C70:2                        | C18:1/C16:1 C18:0/C18:0                   | 1432.0276 | 1432.0319    |                            |              |          |

\* “cp” designates that one of the fatty acids is cyclopropanated

<sup>2</sup> Hsu, F. F., & Turk, J. (2006). Characterization of cardiolipin from *Escherichia coli* by electrospray ionization with multiple stage quadrupole ion-trap mass spectrometric analysis of  $[M-2H+Na]^-$  ions. *Journal of the American Society for Mass Spectrometry*, 17(3), 420–429. doi:10.1016/j.jasms.2005.11.019

**Table S4.** Molecular mass of PS and *N*-acyl-PE species detected in *E. coli*. Each lipid species is presented as the total number of carbons in all alkyl chains on a PL and the total number of unsaturated bonds (after the colon).

| PS acyl chain compositions   | PS mass      |          | <i>N</i> -acyl-PE acyl chain compositions <sup>3</sup> | <i>N</i> -acyl-PE mass |             |
|------------------------------|--------------|----------|--------------------------------------------------------|------------------------|-------------|
|                              | Exact        | Measured |                                                        | Exact                  | Measured    |
| <i>Carbons:unsaturations</i> | <i>[M-H]</i> |          | <i>Carbons:unsaturations</i>                           | <i>[M-H]</i>           |             |
| C34:2                        | 758.4955     | 758.4984 | C46:1                                                  | 898.690                | 898.6899    |
| C34:1                        | 760.5143     | 760.5145 | C48:2                                                  | 924.706                | 924.7060    |
| C36:3                        | 784.5138     | 784.5141 | C48:1                                                  | 926.721                | 926.7226    |
| C36:2                        | 786.5298     | 786.5299 | C49:2                                                  | 938.721                | 938.7218    |
| C36:1                        | 788.5459     | 788.5462 | C49:1                                                  | 940.737                | 940.7370    |
| C38:2                        | 814.5604     | 814.5598 | C50:3                                                  | 950.721                | 950.7196    |
|                              |              |          | C50:2                                                  | 952.737                | 952.7360    |
|                              |              |          | C50:1                                                  | 954.753                | 954.7522    |
|                              |              |          | C52:3                                                  | 978.753                | 978.7499    |
|                              |              |          | C52:2                                                  | 980.768                | 980.7689    |
|                              |              |          | C54:3                                                  | 1006.780               | <i>n.d.</i> |

<sup>3</sup> Mileykovskaya, E., Ryan, A., Mo, X., Lin, C., Khalaf, K., Dowhan, W., & Garrett, T. (2009). Phosphatidic acid and *N*-acylphosphatidylethanolamine form membrane domains in *Escherichia coli* mutant lacking cardiolipin and phosphatidylglycerol. *The Journal of Biological Chemistry*, 284(5), 2990–3000.

**Table S5.** Molecular mass of CDP-DAG species detected in *E. coli*. Each lipid species is presented as the total number of carbons in all alkyl chains on a PL and the total number of unsaturated bonds (after the colon).

| CDP-DAG acyl chain compositions | CDP-DAG mass             |             |
|---------------------------------|--------------------------|-------------|
|                                 | Exact                    | Measured    |
| <i>Carbons:unsaturations</i>    | <i>[M-H]<sup>-</sup></i> |             |
| C28:0                           | 896.4439                 | 896.4408    |
| C30:0                           | 920.4439                 | <i>n.d.</i> |
| C30:1                           | 922.4595                 | 922.4599    |
| C30:2                           | 924.4752                 | 924.4759    |
| C31:0                           | 936.4752                 | 936.4713    |
| C31:1                           | 938.4908                 | <i>n.d.</i> |
| C32:0                           | 948.4752                 | 948.4759    |
| C32:1                           | 948.4752                 | 948.4738    |
| C32:2                           | 950.4908                 | 950.4913    |
| C33:0                           | 952.5065                 | 952.5057    |
| C33:1                           | 962.4908                 | <i>n.d.</i> |
| C33:2                           | 964.5065                 | 964.5048    |
| C34:0                           | 966.5221                 | <i>n.d.</i> |
| C34:1                           | 976.5065                 | 976.5069    |
| C34:2                           | 976.5065                 | 976.5070    |
| C35:1                           | 978.5221                 | 978.5239    |
| C35:2                           | 980.5378                 | <i>n.d.</i> |
| C36:0                           | 990.5221                 | 990.5188    |
| C36:1                           | 992.5378                 | 992.5344    |
| C36:2                           | 998.4908                 | 998.4892    |
| C36:3                           | 1000.5065                | 1000.5035   |
| C36:4                           | 1002.5221                | 1002.5165   |
| C36:5                           | 1004.5378                | 1004.5376   |
| C38:3                           | 1006.5534                | 1006.5518   |
| C38:4                           | 1008.5691                | <i>n.d.</i> |
| C38:5                           | 1026.5221                | 1026.5222   |
| C38:4                           | 1028.5378                | <i>n.d.</i> |
| C38:3                           | 1030.5534                | <i>n.d.</i> |
